# Supplementary material for: Distribution of Soil Microbes in Urban Parks: An Effect of Under-Tree Crown and Hillside Position on Testate Amoeba Assemblages in Subtropics (Shenzhen, China)
Source: MDPI journal article supplement (doi:10.3390/land11122250), 2022-12-09
Supplement: s1 [file s1]

## Supplementary materials

**Table S1.** Brief characteristics of the sampling sites in three urban parks (BA – Baoan, NS – Nanshan, YAL – Yanziling).

| Park | Slope position | Crown position | Latitude (°N) | Longitude (°E) | Altitude (m) |
|------|----------------|----------------|---------------|----------------|--------------|
| BA   | Summit         | CC             | 22.589        | 113.898        | 113          |
| BA   | Summit         | MC             | 22.589        | 113.898        | 113          |
| BA   | Summit         | EC             | 22.589        | 113.898        | 113          |
| BA   | Summit         | CC             | 22.589        | 113.898        | 113          |
| BA   | Summit         | MC             | 22.589        | 113.898        | 113          |
| BA   | Summit         | EC             | 22.589        | 113.898        | 113          |
| BA   | Summit         | CC             | 22.590        | 113.898        | 117          |
| BA   | Summit         | MC             | 22.590        | 113.898        | 117          |
| BA   | Summit         | EC             | 22.590        | 113.898        | 117          |
| BA   | Slope          | CC             | 22.589        | 113.899        | 91           |
| BA   | Slope          | MC             | 22.589        | 113.899        | 91           |
| BA   | Slope          | EC             | 22.589        | 113.899        | 91           |
| BA   | Slope          | CC             | 22.589        | 113.899        | 83           |
| BA   | Slope          | MC             | 22.589        | 113.899        | 83           |
| BA   | Slope          | EC             | 22.589        | 113.899        | 83           |
| BA   | Slope          | CC             | 22.589        | 113.899        | 83           |
| BA   | Slope          | MC             | 22.589        | 113.899        | 83           |
| BA   | Slope          | EC             | 22.589        | 113.899        | 83           |
| BA   | Foot           | CC             | 22.588        | 113.900        | 71           |
| BA   | Foot           | MC             | 22.588        | 113.900        | 71           |
| BA   | Foot           | EC             | 22.588        | 113.900        | 71           |
| BA   | Foot           | CC             | 22.588        | 113.900        | 71           |
| BA   | Foot           | MC             | 22.588        | 113.900        | 71           |
| BA   | Foot           | EC             | 22.588        | 113.900        | 71           |
| BA   | Foot           | CC             | 22.588        | 113.900        | 71           |
| BA   | Foot           | MC             | 22.588        | 113.900        | 71           |
| BA   | Foot           | EC             | 22.588        | 113.900        | 71           |
| NS   | Summit         | CC             | 22.501        | 113.904        | 312          |
| NS   | Summit         | MC             | 22.501        | 113.904        | 312          |
| NS   | Summit         | EC             | 22.501        | 113.904        | 312          |
| NS   | Summit         | CC             | 22.501        | 113.904        | 312          |
| NS   | Summit         | MC             | 22.501        | 113.904        | 312          |
| NS   | Summit         | EC             | 22.501        | 113.904        | 312          |

|     |        |    |        |         |     |
|-----|--------|----|--------|---------|-----|
| NS  | Summit | CC | 22.501 | 113.904 | 312 |
| NS  | Summit | MC | 22.501 | 113.904 | 312 |
| NS  | Summit | EC | 22.501 | 113.904 | 312 |
| NS  | Slope  | CC | 22.502 | 113.908 | 217 |
| NS  | Slope  | MC | 22.502 | 113.908 | 217 |
| NS  | Slope  | EC | 22.502 | 113.908 | 217 |
| NS  | Slope  | CC | 22.502 | 113.908 | 217 |
| NS  | Slope  | MC | 22.502 | 113.908 | 217 |
| NS  | Slope  | EC | 22.502 | 113.908 | 217 |
| NS  | Slope  | CC | 22.502 | 113.908 | 220 |
| NS  | Slope  | MC | 22.502 | 113.908 | 220 |
| NS  | Slope  | EC | 22.502 | 113.908 | 220 |
| NS  | Foot   | CC | 22.502 | 113.910 | 121 |
| NS  | Foot   | MC | 22.502 | 113.910 | 121 |
| NS  | Foot   | EC | 22.502 | 113.910 | 121 |
| NS  | Foot   | CC | 22.502 | 113.910 | 121 |
| NS  | Foot   | MC | 22.502 | 113.910 | 121 |
| NS  | Foot   | EC | 22.502 | 113.910 | 121 |
| NS  | Foot   | CC | 22.502 | 113.910 | 114 |
| NS  | Foot   | MC | 22.502 | 113.910 | 114 |
| NS  | Foot   | EC | 22.502 | 113.910 | 114 |
| YZL | Summit | CC | 22.702 | 114.355 | 111 |
| YZL | Summit | MC | 22.702 | 114.355 | 111 |
| YZL | Summit | EC | 22.702 | 114.355 | 111 |
| YZL | Summit | CC | 22.702 | 114.355 | 111 |
| YZL | Summit | MC | 22.702 | 114.355 | 111 |
| YZL | Summit | EC | 22.702 | 114.355 | 111 |
| YZL | Summit | CC | 22.702 | 114.355 | 106 |
| YZL | Summit | MC | 22.702 | 114.355 | 106 |
| YZL | Summit | EC | 22.702 | 114.355 | 106 |
| YZL | Slope  | CC | 22.703 | 114.356 | 86  |
| YZL | Slope  | MC | 22.703 | 114.356 | 86  |
| YZL | Slope  | EC | 22.703 | 114.356 | 86  |
| YZL | Slope  | CC | 22.704 | 114.356 | 86  |
| YZL | Slope  | MC | 22.704 | 114.356 | 86  |
| YZL | Slope  | EC | 22.704 | 114.356 | 86  |
| YZL | Slope  | CC | 22.704 | 114.356 | 86  |
| YZL | Slope  | MC | 22.704 | 114.356 | 86  |

|     |       |    |        |         |    |
|-----|-------|----|--------|---------|----|
| YZL | Slope | EC | 22.704 | 114.356 | 86 |
| YZL | Foot  | CC | 22.705 | 114.356 | 45 |
| YZL | Foot  | MC | 22.705 | 114.356 | 45 |
| YZL | Foot  | EC | 22.705 | 114.356 | 45 |
| YZL | Foot  | CC | 22.705 | 114.356 | 45 |
| YZL | Foot  | MC | 22.705 | 114.356 | 45 |
| YZL | Foot  | EC | 22.705 | 114.356 | 45 |
| YZL | Foot  | CC | 22.705 | 114.356 | 45 |
| YZL | Foot  | MC | 22.705 | 114.356 | 45 |
| YZL | Foot  | EC | 22.705 | 114.356 | 45 |

**Table S2.** Species relative abundance (%) and occurrence (%) under three crown positions.

| Species                         | Relative abundance (%) |      |      | Occurrence (%) |       |       |
|---------------------------------|------------------------|------|------|----------------|-------|-------|
|                                 | CC                     | MC   | EC   | CC             | MC    | EC    |
| <i>Arcella rotundata</i>        | 1.02                   | 0.39 | 0.26 | 40.74          | 37.04 | 24.00 |
| <i>Centropyxis aerophila</i>    | 0.89                   | 2.49 | 1.89 | 55.56          | 55.56 | 48.00 |
| <i>Centropyxis constricta</i>   | 0.61                   | 1.31 | 0.65 | 29.63          | 51.85 | 24.00 |
| <i>Centropyxis elongata</i>     | 1.45                   | 0.72 | 1.91 | 44.44          | 14.81 | 44.00 |
| <i>Centropyxis minuta</i>       | 0.14                   | 1.19 | 0.16 | 18.52          | 37.04 | 12.00 |
| <i>Centropyxis orbicularis</i>  | 1.4                    | 1.44 | 2.01 | 66.67          | 29.63 | 32.00 |
| <i>Centropyxis platystoma</i>   | 1.89                   | 3.17 | 2.43 | 74.07          | 62.96 | 32.00 |
| <i>Centropyxis sphagnicola</i>  | 2.92                   | 1.73 | 1.43 | 48.15          | 48.15 | 52.00 |
| <i>Centropyxis sylvatica</i>    | 3.64                   | 1.81 | 3.52 | 85.19          | 62.96 | 28.00 |
| <i>Corythion delamarei</i>      | 0.56                   | 1.05 | 0.84 | 33.33          | 29.63 | 28.00 |
| <i>Corythion dubium</i>         | 3.32                   | 1.84 | 1.08 | 74.07          | 37.04 | 32.00 |
| <i>Cryptodiffugia oviformis</i> | 0.21                   | 0.7  | 0.32 | 11.11          | 33.33 | 16.00 |
| <i>Cyclopyxis eurytoma</i>      | 2.74                   | 4.13 | 0.67 | 51.85          | 74.07 | 28.00 |
| <i>Cyclopyxis kahli</i>         | 0.67                   | 0.31 | 1.22 | 29.63          | 14.81 | 32.00 |
| <i>Diffugia lucida</i>          | 0.04                   | 1.09 | 4.2  | 7.41           | 44.44 | 68.00 |
| <i>Diffugia oblonga</i>         | 0.14                   | 1.34 | 8.04 | 7.41           | 29.63 | 76.00 |
| <i>Euglypha ciliata</i>         | 3.01                   | 0.92 | 0.9  | 81.48          | 29.63 | 32.00 |
| <i>Euglypha compressa</i>       | 2.99                   | 1.91 | 1.24 | 81.48          | 51.85 | 40.00 |
| <i>Euglypha denticulata</i>     | 0.89                   | 1.85 | 3.1  | 33.33          | 44.44 | 64.00 |
| <i>Euglypha filifera</i>        | 2.62                   | 0.6  | 1.19 | 62.96          | 18.52 | 20.00 |
| <i>Euglypha laevis</i>          | 0.98                   | 1.08 | 1    | 33.33          | 33.33 | 16.00 |
| <i>Euglypha rotunda</i>         | 3.02                   | 1.62 | 1.24 | 85.19          | 33.33 | 24.00 |
| <i>Euglypha simplex</i>         | 0.91                   | 4.82 | 4.01 | 18.52          | 55.56 | 60.00 |
| <i>Euglypha strigosa</i>        | 3.76                   | 3.36 | 1.99 | 70.37          | 55.56 | 32.00 |
| <i>Galeripora arenaria</i>      | 2.68                   | 0.96 | 1.18 | 66.67          | 40.74 | 40.00 |
| <i>Galeripora artocrea</i>      | 1.88                   | 0.82 | 0.84 | 66.67          | 55.56 | 28.00 |
| <i>Heleopera petricola</i>      | 4.09                   | 1.72 | 0.54 | 100            | 40.74 | 24.00 |
| <i>Heleopera sylvatica</i>      | 1.95                   | 6.66 | 8.48 | 29.63          | 81.48 | 72.00 |

|                                 |      |      |      |       |       |       |
|---------------------------------|------|------|------|-------|-------|-------|
| <i>Hyalosphenia subflava</i>    | 5.31 | 5.15 | 1.99 | 77.78 | 66.67 | 52.00 |
| <i>Phryganella acropodia</i>    | 4    | 3.27 | 2.73 | 59.26 | 59.26 | 36.00 |
| <i>Placocista glabra</i>        | 3.13 | 3.25 | 1.95 | 48.15 | 40.74 | 28.00 |
| <i>Plagiopyxis callida</i>      | 3.33 | 4.91 | 6.31 | 88.89 | 66.67 | 80.00 |
| <i>Plagiopyxis declivis</i>     | 3.85 | 2.67 | 0.95 | 48.15 | 62.96 | 24.00 |
| <i>Pseudodiffugia compressa</i> | 4.13 | 6.34 | 5.53 | 51.85 | 81.48 | 64.00 |
| <i>Pseudodiffugia gracilis</i>  | 6.5  | 2.02 | 1.85 | 96.3  | 51.85 | 40.00 |
| <i>Quadrullella symmetrica</i>  | 0.8  | 2.18 | 1.03 | 44.44 | 48.15 | 28.00 |
| <i>Schoenbornia humicola</i>    | 0.13 | 1.3  | 0.83 | 11.11 | 44.44 | 16.00 |
| <i>Trigonopyxis arcula</i>      | 5.48 | 2.06 | 2.08 | 92.59 | 51.85 | 36.00 |
| <i>Trinema complanatum</i>      | 4.15 | 4.34 | 6.59 | 88.89 | 77.78 | 80.00 |
| <i>Trinema enchelys</i>         | 5.3  | 6.27 | 6.68 | 85.19 | 88.89 | 80.00 |
| <i>Trinema lineare</i>          | 1.6  | 3.37 | 5.05 | 55.56 | 66.67 | 56.00 |
| <i>Trinema penardi</i>          | 1.88 | 1.84 | 0.1  | 66.67 | 48.15 | 8.00  |

Table S3. Species relative abundance (%) and occurrence (%) at three hillside positions.

| Species                         | Relative abundance (%) |       |      | Occurrence (%) |       |       |
|---------------------------------|------------------------|-------|------|----------------|-------|-------|
|                                 | Summit                 | Slope | Foot | Summit         | Slope | Foot  |
| <i>Arcella rotundata</i>        | 1.43                   | 0.6   | 0.54 | 26.92          | 23.08 | 51.85 |
| <i>Centropyxis aerophila</i>    | 1.29                   | 2.36  | 1.39 | 34.62          | 57.69 | 66.67 |
| <i>Centropyxis constricta</i>   | 1.63                   | 1.42  | 0.48 | 34.62          | 46.15 | 25.93 |
| <i>Centropyxis elongata</i>     | 1.23                   | 1.51  | 1.22 | 30.77          | 34.62 | 37.04 |
| <i>Centropyxis minuta</i>       | 1.04                   | 0.49  | 0.4  | 34.62          | 23.08 | 11.11 |
| <i>Centropyxis orbicularis</i>  | 1.26                   | 1.08  | 1.79 | 30.77          | 38.46 | 59.26 |
| <i>Centropyxis platystoma</i>   | 2.92                   | 1.67  | 2.67 | 46.15          | 53.85 | 70.37 |
| <i>Centropyxis sphagnicola</i>  | 1.96                   | 1.67  | 2.48 | 34.62          | 34.62 | 77.78 |
| <i>Centropyxis sylvatica</i>    | 2.41                   | 2.53  | 3.31 | 46.15          | 65.38 | 66.67 |
| <i>Corythion delamarei</i>      | 1.09                   | 1.16  | 0.57 | 26.92          | 26.92 | 37.04 |
| <i>Corythion dubium</i>         | 3.62                   | 3.22  | 1.77 | 50             | 50    | 44.44 |
| <i>Cryptodiffugia oviformis</i> | 0.76                   | 0.65  | 0.23 | 30.77          | 19.23 | 11.11 |
| <i>Cyclopyxis eurystoma</i>     | 2.75                   | 2.07  | 3.07 | 50             | 42.31 | 62.96 |
| <i>Cyclopyxis kahli</i>         | 1.04                   | 1.13  | 0.4  | 26.92          | 30.77 | 18.52 |
| <i>Diffugia lucida</i>          | 1.01                   | 0.94  | 1.45 | 34.62          | 26.92 | 55.56 |
| <i>Diffugia oblonga</i>         | 1.54                   | 1.28  | 2.71 | 30.77          | 34.62 | 44.44 |
| <i>Euglypha ciliata</i>         | 2.02                   | 2.82  | 1.43 | 50             | 57.69 | 37.04 |
| <i>Euglypha compressa</i>       | 2.95                   | 1.71  | 2.38 | 50             | 50    | 74.07 |
| <i>Euglypha denticulata</i>     | 1.63                   | 1.56  | 1.73 | 42.31          | 46.15 | 51.85 |
| <i>Euglypha filifera</i>        | 2.16                   | 2.02  | 1.4  | 34.62          | 38.46 | 29.63 |
| <i>Euglypha laevis</i>          | 1.15                   | 2.58  | 0.33 | 26.92          | 38.46 | 18.52 |
| <i>Euglypha rotunda</i>         | 2.89                   | 4.51  | 1.06 | 46.15          | 53.85 | 44.44 |
| <i>Euglypha simplex</i>         | 0.84                   | 2.67  | 3.31 | 34.62          | 42.31 | 55.56 |
| <i>Euglypha strigosa</i>        | 4.66                   | 2.63  | 3.28 | 57.69          | 34.62 | 66.67 |
| <i>Galeripora arenaria</i>      | 1.35                   | 1.03  | 2.19 | 38.46          | 34.62 | 74.07 |
| <i>Galeripora artocrea</i>      | 1.04                   | 1.17  | 1.41 | 34.62          | 34.62 | 81.48 |

|                                 |      |      |      |       |       |       |
|---------------------------------|------|------|------|-------|-------|-------|
| <i>Heleopera petricola</i>      | 2.97 | 3    | 2.28 | 57.69 | 57.69 | 51.85 |
| <i>Heleopera sylvatica</i>      | 3.79 | 2.95 | 5.92 | 50    | 53.85 | 77.78 |
| <i>Hyalosphenia subflava</i>    | 3.23 | 4.09 | 4.99 | 53.85 | 65.38 | 77.78 |
| <i>Phryganella acropodia</i>    | 3.03 | 3.94 | 3.37 | 46.15 | 50    | 59.26 |
| <i>Placocista glabra</i>        | 4.29 | 4.18 | 2.14 | 42.31 | 46.15 | 29.63 |
| <i>Plagiopyxis callida</i>      | 4.04 | 5.15 | 4.27 | 76.92 | 69.23 | 88.89 |
| <i>Plagiopyxis declivis</i>     | 2.27 | 4.02 | 2.45 | 42.31 | 46.15 | 48.15 |
| <i>Pseudodiffugia compressa</i> | 3.98 | 3.06 | 6.27 | 50    | 57.69 | 88.89 |
| <i>Pseudodiffugia gracilis</i>  | 4.52 | 3.34 | 4.23 | 50    | 61.54 | 77.78 |
| <i>Quadrulella symmetrica</i>   | 2.08 | 1.58 | 1.06 | 42.31 | 46.15 | 33.33 |
| <i>Schoenbornia humicola</i>    | 1.4  | 1.07 | 0.37 | 26.92 | 30.77 | 14.81 |
| <i>Trigonopyxis arcula</i>      | 4.01 | 3.05 | 3.8  | 53.85 | 53.85 | 74.07 |
| <i>Trinema complanatum</i>      | 3.98 | 3.05 | 5.57 | 80.77 | 65.38 | 100   |
| <i>Trinema enchelys</i>         | 4.91 | 5.96 | 6.07 | 65.38 | 88.46 | 100   |
| <i>Trinema lineare</i>          | 1.43 | 3.47 | 2.94 | 46.15 | 65.38 | 66.67 |
| <i>Trinema penardi</i>          | 2.41 | 1.61 | 1.29 | 42.31 | 38.46 | 44.44 |

Table S4. Environmental characteristics of the samples.

| Sample ID | Soil moisture (%) | pH  | Thickness of leaf litter (cm) |
|-----------|-------------------|-----|-------------------------------|
| BAPT-1-1  | 13.3              | 6.8 | 2                             |
| BAPT-1-2  | 12.3              | 6.8 | 1                             |
| BAPT-1-3  | 13.2              | 6.8 | 1                             |
| BAPT-2-1  | 11.5              | 6.9 | 1                             |
| BAPT-2-2  | 11.1              | 6.9 | 2                             |
| BAPT-2-3  | 13.2              | 6.8 | 2                             |
| BAPT-3-1  | 7.4               | 6.8 | 3                             |
| BAPT-3-2  | 7.7               | 6.9 | 0                             |
| BAPT-3-3  | 14.8              | 6.8 | 0                             |
| BAPM-1-1  | 9.4               | 6.9 | 4                             |
| BAPM-1-2  | 9.8               | 6.9 | 0.5                           |
| BAPM-1-3  | 11.1              | 6.9 | 0.5                           |
| BAPM-2-1  | 7.2               | 6.8 | 2                             |
| BAPM-2-2  | 8                 | 6.7 | 2                             |
| BAPM-2-3  | 6.3               | 6.8 | 2                             |
| BAPM-3-1  | 6.6               | 6.9 | 3                             |
| BAPM-3-2  | 3.5               | 7   | 0                             |
| BAPM-3-3  | 3.6               | 7   | 0                             |
| BAPB-1-1  | 15.9              | 6.7 | 2                             |
| BAPB-1-2  | 12.7              | 6.7 | 2                             |
| BAPB-1-3  | 8                 | 6.7 | 2                             |
| BAPB-2-1  | 7.5               | 6.9 | 3                             |
| BAPB-2-2  | 8.2               | 6.9 | 3                             |
| BAPB-2-3  | 11.3              | 6.8 | 2                             |
| BAPB-3-1  | 11.3              | 6.6 | 2                             |
| BAPB-3-2  | 8.9               | 6.7 | 2                             |
| BAPB-3-3  | 8.3               | 6.6 | 2                             |

|           |      |     |     |
|-----------|------|-----|-----|
| NSPT-1-1  | 5.7  | 7   | 1.5 |
| NSPT-1-2  | 4    | 7   | 1.5 |
| NSPT-1-3  | 7.7  | 7   | 1.5 |
| NSPT-2-1  | 3.8  | 7   | 1.5 |
| NSPT-2-2  | 3.6  | 7   | 1.5 |
| NSPT-2-3  | 5.4  | 7   | 1.5 |
| NSPT-3-1  | 5.8  | 6.9 | 3   |
| NSPT-3-2  | 10   | 6.9 | 3   |
| NSPT-3-3  | 7    | 7   | 3   |
| NSPM-1-1  | 5.6  | 6.9 | 0   |
| NSPM-1-2  | 4.3  | 6.9 | 0   |
| NSPM-1-3  | 1.7  | 6.9 | 0   |
| NSPM-2-1  | 3.6  | 6.9 | 1   |
| NSPM-2-2  | 12.3 | 7   | 3   |
| NSPM-2-3  | 8.5  | 6.9 | 1   |
| NSPM-3-1  | 5.7  | 6.9 | 3   |
| NSPM-3-2  | 8.6  | 6.9 | 3   |
| NSPM-3-3  | 7.5  | 6.9 | 3   |
| NSPB-1-1  | 8.3  | 6.9 | 3   |
| NSPB-1-2  | 5.6  | 6.9 | 3   |
| NSPB-1-3  | 8    | 6.9 | 3   |
| NSPB-2-1  | 6.3  | 6.9 | 3   |
| NSPB-2-2  | 4.3  | 6.9 | 3   |
| NSPB-2-3  | 5.7  | 7   | 3   |
| NSPB-3-1  | 5.7  | 6.9 | 0   |
| NSPB-3-2  | 5.2  | 6.9 | 0   |
| NSPB-3-3  | 16.3 | 6.9 | 0   |
| YZLPT-1-1 | 17.6 | 6.9 | 1.5 |
| YZLPT-1-2 | 14.3 | 7   | 1.5 |
| YZLPT-1-3 | 11.3 | 7   | 1.5 |
| YZLPT-2-1 | 15.7 | 6.9 | 1.5 |
| YZLPT-2-2 | 15   | 6.9 | 1.5 |
| YZLPT-2-3 | 18.2 | 6.9 | 1.5 |
| YZLPT-3-1 | 9.3  | 6.9 | 3   |
| YZLPT-3-2 | 12.2 | 7   | 2.5 |
| YZLPT-3-3 | 14   | 6.9 | 3   |
| YZLPM-1-1 | 6.3  | 6.9 | 5   |
| YZLPM-1-2 | 5.9  | 7   | 5   |
| YZLPM-1-3 | 6.3  | 6.9 | 5   |
| YZLPM-2-1 | 5.8  | 6.9 | 0   |
| YZLPM-2-2 | 6.6  | 6.9 | 0   |
| YZLPM-2-3 | 6.9  | 6.9 | 0   |
| YZLPM-3-1 | 7.5  | 6.9 | 0   |
| YZLPM-3-2 | 5.2  | 6.9 | 0   |
| YZLPM-3-3 | 7.8  | 7   | 0   |
| YZLPB-1-1 | 8.2  | 6.9 | 2.5 |
| YZLPB-1-2 | 17.5 | 7   | 2.5 |
| YZLPB-1-3 | 10.7 | 6.9 | 2.5 |
| YZLPB-2-1 | 11.1 | 6.9 | 2.5 |

|           |      |     |     |
|-----------|------|-----|-----|
| YZLPB-2-2 | 11.4 | 6.9 | 1.5 |
| YZLPB-2-3 | 7.3  | 7   | 1.5 |
| YZLPB-3-1 | 11.1 | 6.9 | 3   |
| YZLPB-3-2 | 9.3  | 6.9 | 3   |
| YZLPB-3-3 | 8.8  | 6.9 | 4   |

Table S5. TA species functional traits.

| Species                         | Pseudopod type | Aperture position |
|---------------------------------|----------------|-------------------|
| <i>Arcella rotundata</i>        | Lobose         | Axial             |
| <i>Centropyxis aerophila</i>    | Lobose         | Plagiostomic      |
| <i>Centropyxis constricta</i>   | Lobose         | Plagiostomic      |
| <i>Centropyxis elongata</i>     | Lobose         | Plagiostomic      |
| <i>Centropyxis minuta</i>       | Lobose         | Plagiostomic      |
| <i>Centropyxis orbicularis</i>  | Lobose         | Plagiostomic      |
| <i>Centropyxis platystoma</i>   | Lobose         | Plagiostomic      |
| <i>Centropyxis sphagnicola</i>  | Lobose         | Plagiostomic      |
| <i>Centropyxis sylvatica</i>    | Lobose         | Plagiostomic      |
| <i>Corythion delamarei</i>      | Filose         | Plagiostomic      |
| <i>Corythion dubium</i>         | Filose         | Plagiostomic      |
| <i>Cryptodiffugia oviformis</i> | Lobose         | Acrostomic        |
| <i>Cyclopyxis eurystoma</i>     | Lobose         | Acrostomic        |
| <i>Cyclopyxis kahli</i>         | Lobose         | Acrostomic        |
| <i>Diffugia lucida</i>          | Lobose         | Acrostomic        |
| <i>Diffugia oblonga</i>         | Lobose         | Acrostomic        |
| <i>Euglypha ciliata</i>         | Filose         | Acrostomic        |
| <i>Euglypha compressa</i>       | Filose         | Acrostomic        |
| <i>Euglypha denticulata</i>     | Filose         | Acrostomic        |
| <i>Euglypha filifera</i>        | Filose         | Acrostomic        |
| <i>Euglypha laevis</i>          | Filose         | Acrostomic        |
| <i>Euglypha rotunda</i>         | Filose         | Acrostomic        |
| <i>Euglypha simplex</i>         | Filose         | Acrostomic        |
| <i>Euglypha strigosa</i>        | Filose         | Acrostomic        |
| <i>Galeripora arenaria</i>      | Lobose         | Axial             |
| <i>Galeripora artocrea</i>      | Lobose         | Axial             |
| <i>Heleopera petricola</i>      | Lobose         | Acrostomic        |
| <i>Heleopera sylvatica</i>      | Lobose         | Acrostomic        |
| <i>Hyalosphenia subflava</i>    | Lobose         | Acrostomic        |
| <i>Phryganella acropodia</i>    | Lobose         | Acrostomic        |
| <i>Placocista glabra</i>        | Filose         | Acrostomic        |
| <i>Plagiopyxis callida</i>      | Filose         | Plagiostomic      |
| <i>Plagiopyxis declivis</i>     | Filose         | Plagiostomic      |
| <i>Pseudodiffugia compressa</i> | Filose         | Acrostomic        |
| <i>Pseudodiffugia gracilis</i>  | Filose         | Acrostomic        |
| <i>Quadrullella symmetrica</i>  | Lobose         | Acrostomic        |
| <i>Schoenbornia humicola</i>    | Lobose         | Acrostomic        |
| <i>Trigonopyxis arcula</i>      | Lobose         | Axial             |
| <i>Trinema complanatum</i>      | Filose         | Plagiostomic      |
| <i>Trinema enchelys</i>         | Filose         | Plagiostomic      |
| <i>Trinema lineare</i>          | Filose         | Plagiostomic      |

*Trinema penardi*

## Filose

## Plagiostomic

**Table S6.** Environmental characteristics (mean  $\pm$  SE) at the three crown positions (CC – center of the crown, MC – middle of the crown, EC – edge of the crown).

|                                   | CC              | MC              | EC              | F value | P value  |
|-----------------------------------|-----------------|-----------------|-----------------|---------|----------|
|                                   | N=27            | N=27            | N=25            |         | P = 0.05 |
| Soil moisture (%)                 | 8.64 $\pm$ 0.71 | 8.80 $\pm$ 0.74 | 9.58 $\pm$ 0.74 | 0.47    | 0.628    |
| pH                                | 6.88 $\pm$ 0.02 | 6.90 $\pm$ 0.02 | 6.89 $\pm$ 0.02 | 0.56    | 0.573    |
| The thickness of leaf litter (cm) | 2.11 $\pm$ 0.24 | 1.78 $\pm$ 0.25 | 1.80 $\pm$ 0.27 | 0.55    | 0.577    |

**Table S7.** Environmental characteristics (mean  $\pm$  SE) at the three hillside positions

|                                   | Summit           | Slope           | Foot            | F value | P value  |
|-----------------------------------|------------------|-----------------|-----------------|---------|----------|
|                                   | N = 26           | N = 26          | N = 27          |         | P = 0.05 |
| Soil moisture (%)                 | 10.67 $\pm$ 0.85 | 6.92 $\pm$ 0.43 | 9.37 $\pm$ 0.65 |         | 0.002    |
| pH                                | 6.91 $\pm$ 0.02  | 6.90 $\pm$ 0.01 | 6.86 $\pm$ 0.02 | 3.20    | 0.046    |
| The thickness of leaf litter (cm) | 1.77 $\pm$ 0.17  | 1.65 $\pm$ 0.35 | 2.26 $\pm$ 0.19 |         | 0.073    |

**Table S8.** Pairwise PerMANOVA results for differences in TA assemblage composition at three crown positions.

|          | F value | R <sup>2</sup> | P value  |
|----------|---------|----------------|----------|
|          |         |                | P = 0.05 |
| CC vs MC | 8.41    | 0.14           | 0.001    |
| CC vs EC | 13.24   | 0.21           | 0.001    |
| MC vs EC | 3.82    | 0.07           | 0.001    |

**Table S9.** The significance of RDA constraints.

|                              | Variance | F value | P value  |
|------------------------------|----------|---------|----------|
|                              |          |         | P = 0.05 |
| Moisture                     | 0.005    | 0.87    | 0.581    |
| pH                           | 0.005    | 0.91    | 0.543    |
| The thickness of leaf litter | 0.008    | 1.35    | 0.137    |
| Crown position               | 0.053    | 8.80    | 0.001    |
| Slope position               | 0.014    | 2.34    | 0.006    |
